# Supplementary material for: “Monkeypox: What Do You Know about That?” Italian Adults’ Awareness of a New Epidemic
Source: MDPI journal article supplement (doi:10.3390/pathogens11111285), 2022-11-01
Supplement: s1 [file s1]

**Table S1.** Results of the univariate analysis performed considering the level of MPXV knowledge reached by participants (701 lower or equal, 651 higher than the median value).

| Variable                                              | MPX Knowledge<br>≤ Median Value<br>n (%) | MPX Knowledge<br>> Median Value<br>n (%) | <i>p</i> Value |
|-------------------------------------------------------|------------------------------------------|------------------------------------------|----------------|
| Age                                                   |                                          |                                          |                |
| ≤53                                                   | 315 (44.9)                               | 359 (55.1)                               | <0.001         |
| >53                                                   | 386 (55.1)                               | 292 (44.9)                               |                |
| Gender                                                |                                          |                                          |                |
| males                                                 | 321 (45.8)                               | 322 (49.5)                               | 0.177          |
| females                                               | 380 (54.2)                               | 329 (50.5)                               |                |
| Education                                             |                                          |                                          |                |
| elementary                                            | 5 (0.7)                                  | 3 (0.5)                                  | <0.001         |
| middle                                                | 71 (10.1)                                | 33 (5.1)                                 |                |
| high school                                           | 298 (42.5)                               | 189 (29.0)                               |                |
| degree                                                | 246 (35.1)                               | 256 (39.3)                               |                |
| post-degree                                           | 81 (11.6)                                | 170 (26.1)                               |                |
| Occupational status                                   |                                          |                                          |                |
| not studying nor working                              | 94 (13.4)                                | 48 (7.4)                                 | <0.001         |
| studying                                              | 16 (2.3)                                 | 9 (1.4)                                  |                |
| working                                               | 359 (51.2)                               | 434 (66.7)                               |                |
| retired                                               | 232 (33.1)                               | 160 (24.6)                               |                |
| Study or work in healthcare setting                   |                                          |                                          |                |
| no                                                    | 622 (89.2)                               | 169 (26.9)                               | 0              |
| yes                                                   | 75 (10.8)                                | 459 (73.1)                               |                |
| Marital status                                        |                                          |                                          |                |
| single (never married)                                | 59 (8.4)                                 | 77 (11.8)                                | <0.001         |
| single (divorced)                                     | 217 (31.0)                               | 138 (21.2)                               |                |
| widowed                                               | 122 (17.4)                               | 89 (13.7)                                |                |
| engaged                                               | 59 (8.4)                                 | 74 (11.4)                                |                |
| married                                               | 243 (34.7)                               | 273 (41.9)                               |                |
| Affected by a chronic disease                         |                                          |                                          |                |
| no                                                    | 172 (24.5)                               | 314 (48.2)                               | 0              |
| yes                                                   | 529 (75.5)                               | 337 (51.8)                               |                |
| COVID-19                                              |                                          |                                          |                |
| no                                                    | 414 (59.1)                               | 437 (67.1)                               | 0.002          |
| yes                                                   | 287 (40.9)                               | 214 (32.9)                               |                |
| Vaccinated against:                                   |                                          |                                          |                |
| Flu                                                   | 443 (63.2)                               | 435 (66.8)                               | 0.163          |
| COVID-19                                              | 689 (98.3)                               | 635 (97.5)                               | 0.336          |
| Smallpox                                              | 386 (55.1)                               | 323 (49.6)                               | <0.001         |
| Having some family member vaccinated against Smallpox |                                          |                                          |                |
| no                                                    | 22 (3.1)                                 | 29 (4.5)                                 | 0.204          |
| yes                                                   | 679 (96.9)                               | 622 (95.5)                               |                |

|                                       |            |            |        |
|---------------------------------------|------------|------------|--------|
| Knowing someone affected by MPX       |            |            |        |
| no                                    | 695 (99.1) | 626 (96.2) | <0.001 |
| yes                                   | 6 (0.9)    | 25 (3.8)   |        |
| Main source of information about MPX: |            |            |        |
| TV/radio/newspapers                   | 654 (93.3) | 503 (77.3) | 0      |
| social media                          | 35 (5.0)   | 73 (11.2)  |        |
| doctor                                | 12 (1.7)   | 75 (11.5)  |        |
| Favorable to MPX vaccination          |            |            |        |
| no                                    | 257 (36.7) | 107 (16.4) | 0      |
| yes                                   | 213 (30.4) | 406 (62.4) |        |
| I don't know                          | 231 (33.0) | 138 (21.2) |        |
